# Supplementary material
Source: ML conference proceedings conference paper supplement (https://openreview.net/forum?id=goe6fv6iSh)

# KS-statistic for various layer sizes in a 2-layer NN

$n_0 = 1$ , varying  $n_1, \phi_\theta^o$

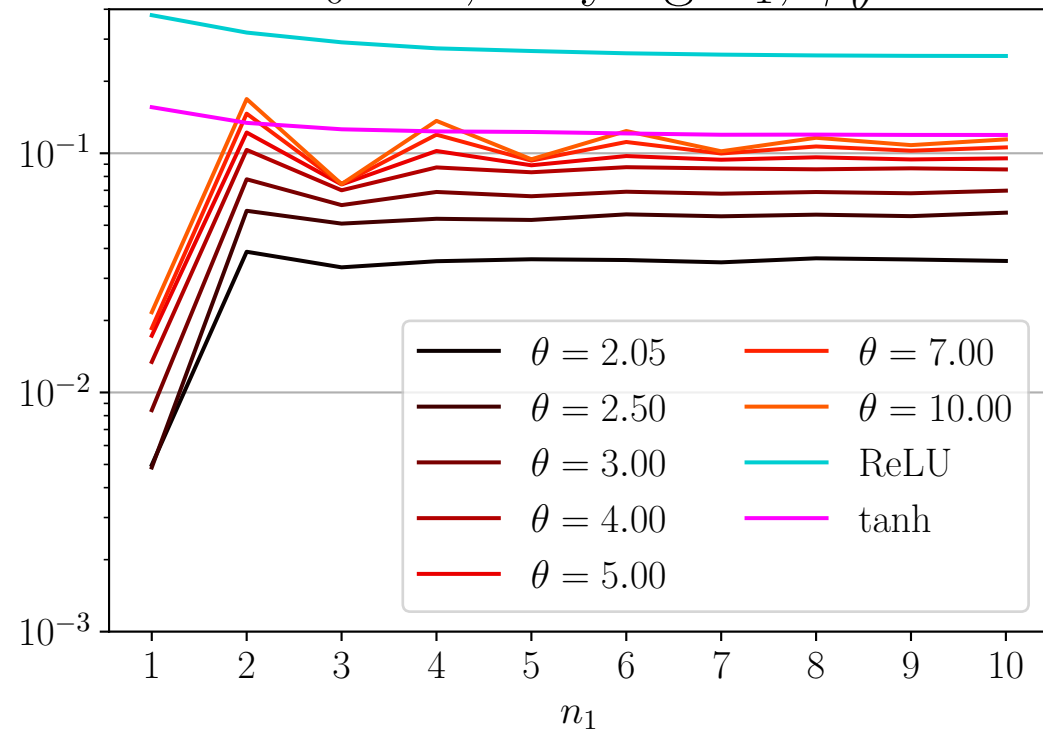

$n_1 = 2$ , varying  $n_0, \phi_\theta^o$

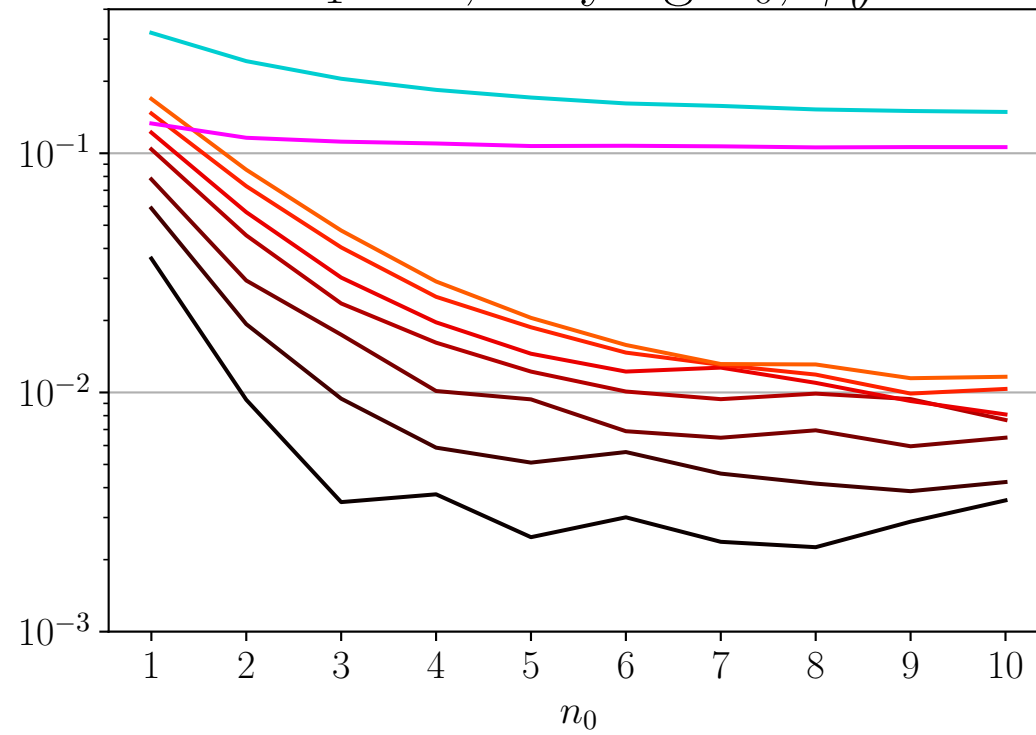

varying  $n_0, n_1, \phi_\theta^o$

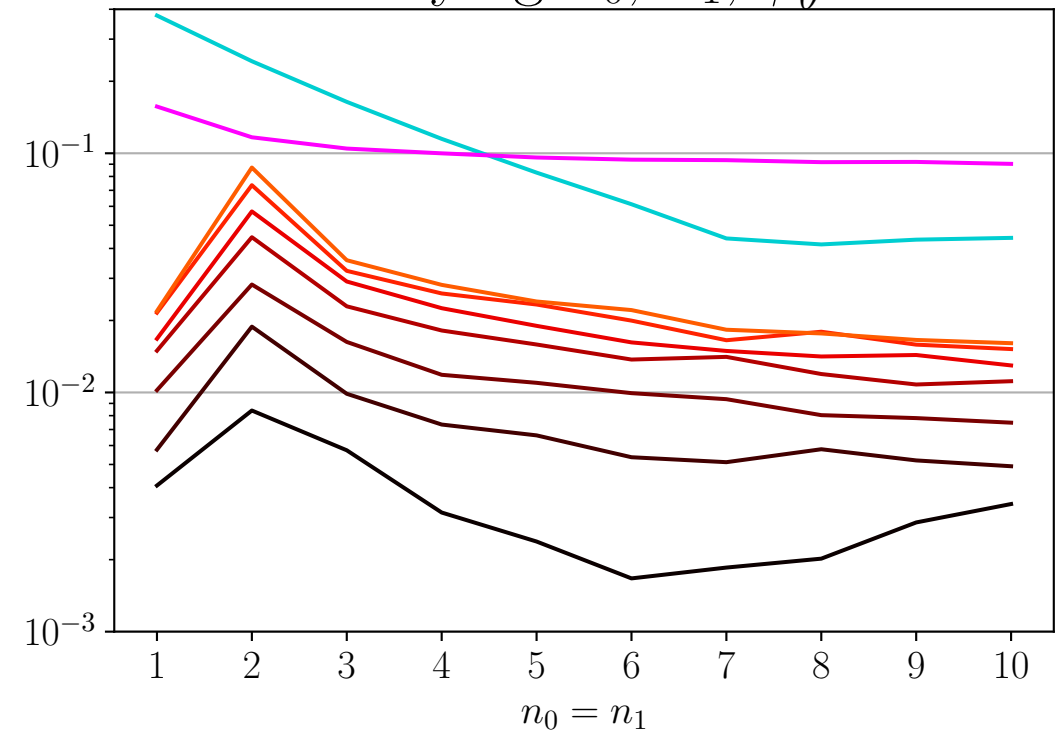

$n_0 = 1$ , varying  $n_1, \phi_\theta^p$

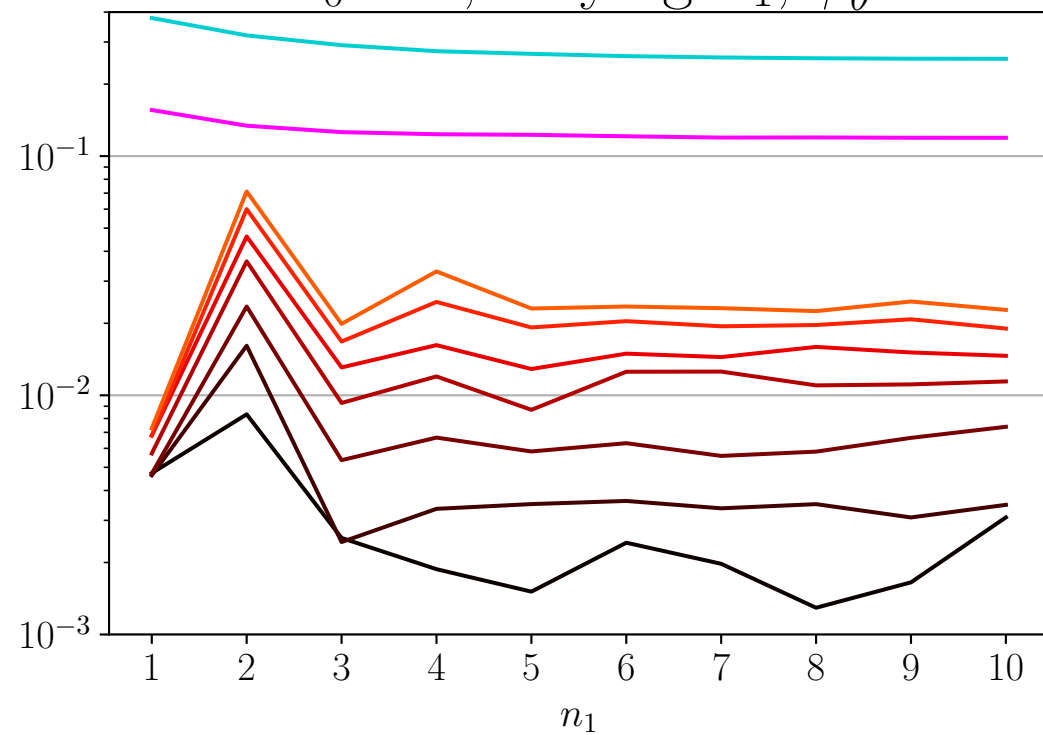

$n_1 = 2$ , varying  $n_0, \phi_\theta^p$

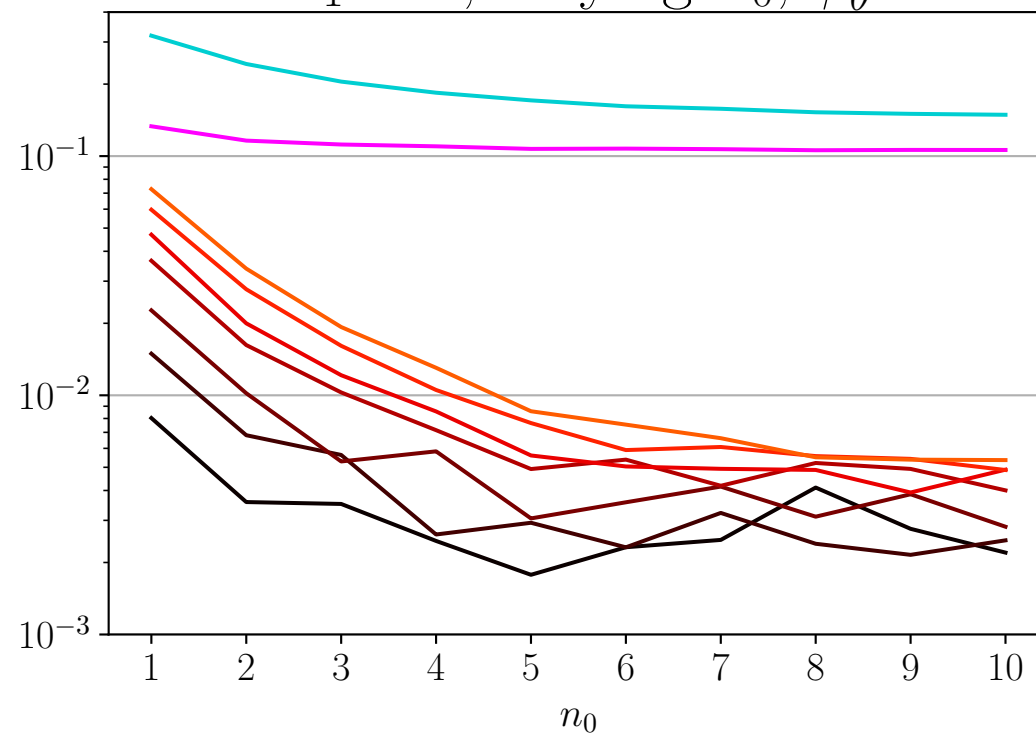

varying  $n_0, n_1, \phi_\theta^p$

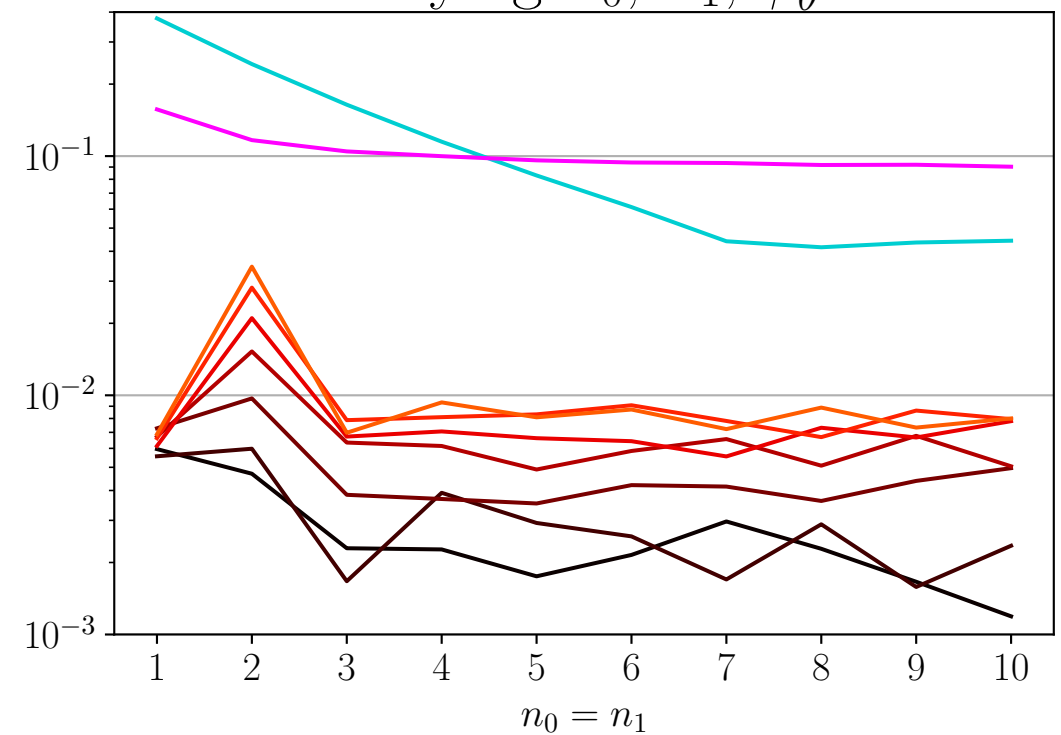

Supplement: supplementary_material [file attachment]
